# Supplementary material
Source: MDPI journal article supplement (https://www.mdpi.com/2073-445X/12/10/1853)
Supplement: s1 [file s1]

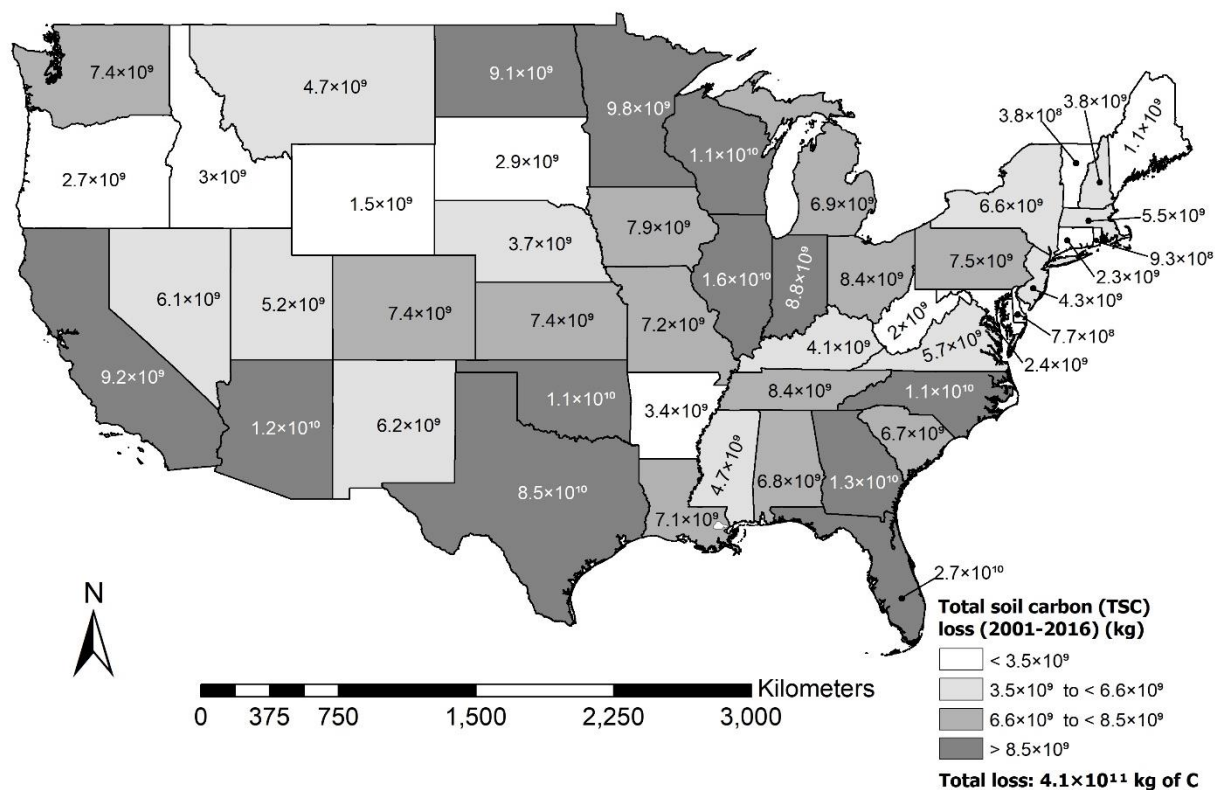

**Figure S2.** Inequities in damages to climate because of soil carbon (C) loss with associated emissions from developments between 2001 and 2016 in the contiguous United States of America (USA).

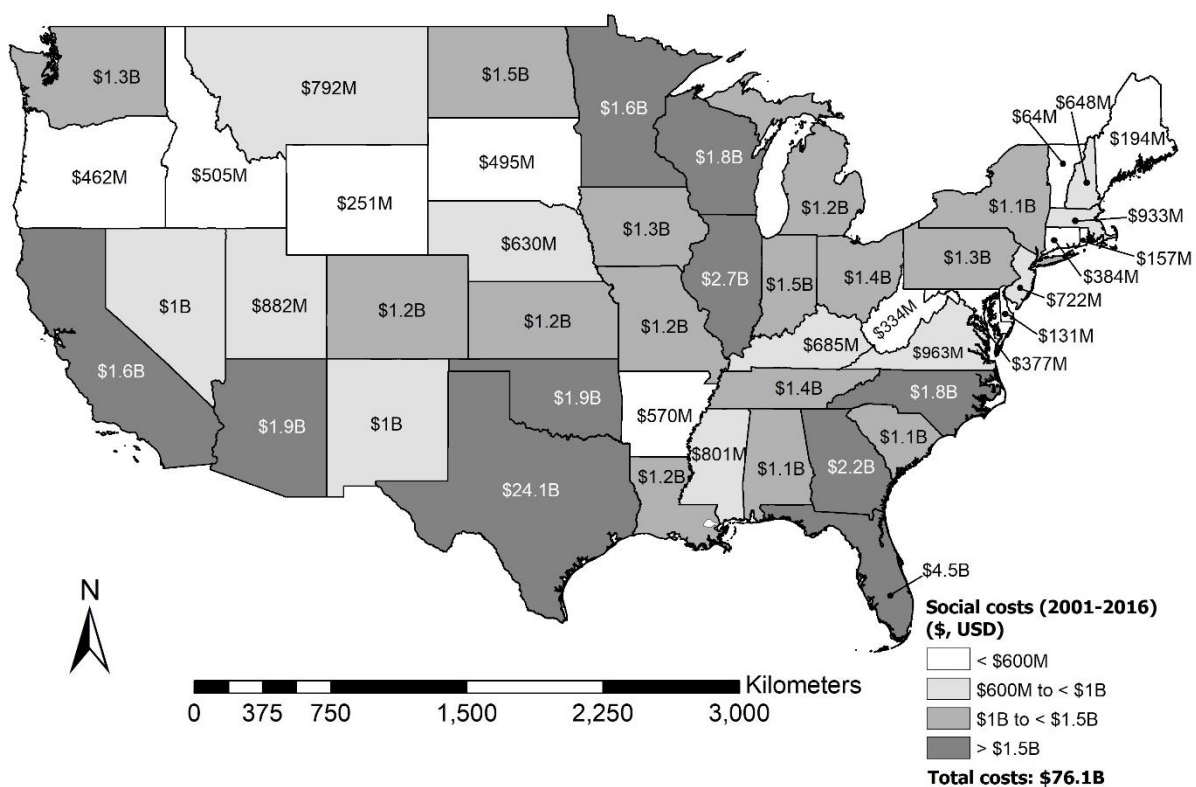

**Figure S3.** Damage to climate can be measured as “realized” social costs of soil carbon (C) (SC-CO<sub>2</sub>) from developments between 2001 and 2016 in the contiguous United States of America (USA) using an avoided social cost of carbon (SC-CO<sub>2</sub>) value of \$46 per CO<sub>2</sub> metric ton, applicable until 2025 (2007 U.S. dollars, with an average discount rate of 3% [19]). The map shows inequities in SC-CO<sub>2</sub> distribution. Note: M = million = 10<sup>6</sup>, B = billion = 10<sup>9</sup>.

**Table S1.** Soil diversity (pedodiversity) is represented by taxonomic diversity at the soil order level in the contiguous United States of America (USA).

| Stocks       |                                                      | Area (2016)        |              |
|--------------|------------------------------------------------------|--------------------|--------------|
| Soil Order   | General Characteristics and Constraints              | (km <sup>2</sup> ) | (%)          |
|              | <b>Slightly Weathered</b>                            | <b>1,857,740.0</b> | <b>28.4</b>  |
| Entisols     | Embryonic soils with an ochric epipedon              | 820,179.8          | 13.4         |
| Inceptisols  | Young soils with an ochric or umbric epipedon        | 767,051.7          | 12.5         |
| Histosols    | Organic soils with $\geq 20\%$ organic carbon        | 97,224.9           | 1.6          |
| Andisols     | Volcanic soils                                       | 57,761.2           | 0.9          |
|              | <b>Moderately Weathered</b>                          | <b>3,436,342.0</b> | <b>56.2</b>  |
| Aridisols    | Dry soils. Common in desert areas                    | 53,8450.4          | 8.8          |
| Vertisols    | Soils with swelling clays                            | 145,189.9          | 2.4          |
| Alfisols     | Clay-enriched B horizon with B.S. $\geq 35\%$        | 1,053,727.4        | 17.2         |
| Mollisols    | Carbon-enriched soils with B.S. $\geq 50\%$          | 1,698,974.9        | 27.8         |
|              | <b>Strongly Weathered</b>                            | <b>942,348.4</b>   | <b>15.4</b>  |
| Spodosols    | Coarse-textured soils with albic and spodic horizons | 207,924.4          | 3.4          |
| Ultisols     | Highly leached soils with B.S. $< 35\%$              | 734,424.0          | 12.0         |
| <b>Total</b> |                                                      | <b>6,120,908.6</b> | <b>100.0</b> |

Note: B.S. = base saturation. Entisols, Inceptisols, Andisols, Aridisols, Vertisols, Alfisols, Mollisols, Spodosols, and Ultisols are mineral soils. Histosols are mostly organic soils.

**Table S2.** An overview of the accounting framework used by this study for monitoring the realization of the United Nations (UN) Sustainable Development Goals (SDGs) in the contiguous United States of America (USA) (adapted from Groshans et al. 2019 [16]).

| OWNERSHIP (e.g., government, private, foreign, shared, single, etc.) |                                                                                                                                                                                           |                                             |                                                                                      |                                                 |                                                                                                                                    |
|----------------------------------------------------------------------|-------------------------------------------------------------------------------------------------------------------------------------------------------------------------------------------|---------------------------------------------|--------------------------------------------------------------------------------------|-------------------------------------------------|------------------------------------------------------------------------------------------------------------------------------------|
| Time<br>(e.g., information disclosure, etc.)                         | STOCKS / SOURCE ATTRIBUTION                                                                                                                                                               |                                             | FLOWS                                                                                |                                                 | VALUE                                                                                                                              |
|                                                                      | Biophysical Accounts<br>(Science-Based)                                                                                                                                                   | Administrative Accounts<br>(Boundary-Based) | Monetary Account(s)                                                                  | Benefit(s)/ Damages                             | Total Value                                                                                                                        |
|                                                                      | Soil extent:                                                                                                                                                                              | Administrative extent:                      | Ecosystem good(s) and service(s):                                                    | Sector:                                         | Types of value:                                                                                                                    |
|                                                                      | Composite (total) stock: Total soil carbon (TSC) = Soil organic carbon (SOC) + Soil inorganic carbon (SIC)                                                                                |                                             |                                                                                      |                                                 |                                                                                                                                    |
| Past<br>(e.g., post-development disclosures)                         | - Soil orders (Entisols, Inceptisols, Histosols, Andisols, Aridisols, Vertisols, Alfisols, Mollisols, Spodosols, Ultisols)<br><br>- Country (Contiguous USA);<br><br>- States (48 states) |                                             | Environment:                                                                         |                                                 | "Avoided" or "realized" social cost of carbon (SC-CO <sub>2</sub> ) emissions:                                                     |
| Current (e.g., status)                                               |                                                                                                                                                                                           |                                             | - Regulation (e.g., carbon sequestration);<br>- Provisioning (e.g., food production) | - Carbon gain (sequestration);<br>- Carbon loss | - \$46 per metric ton of CO <sub>2</sub> applicable for the year 2025 (2007 U.S. dollars with an average discount rate of 3% [19]) |
| Future<br>(e.g., pre-development disclosures)                        |                                                                                                                                                                                           |                                             | Conflicts of Interest (COI)                                                          |                                                 |                                                                                                                                    |
| United Nations (UN) Sustainable Development Goals (SDGs)             |                                                                                                                                                                                           |                                             |                                                                                      |                                                 |                                                                                                                                    |
| Loss and Damage (L&D)                                                |                                                                                                                                                                                           |                                             |                                                                                      |                                                 |                                                                                                                                    |
| Liability (Responsibility)                                           |                                                                                                                                                                                           |                                             |                                                                                      |                                                 |                                                                                                                                    |

**Table S3.** Area-normalized content ( $\text{kg m}^{-2}$ ) and monetary values ( $\$ \text{m}^{-2}$ ) of soil organic carbon (SOC), soil inorganic carbon (SIC), and total soil carbon (TSC = SOC + SIC) by soil order using data developed by Guo et al. (2006) [18] for the upper 2-m of soil and an avoided social cost of carbon (SC- $\text{CO}_2$ ) of \$46 per metric ton of  $\text{CO}_2$ , applicable for 2025 (2007 U.S. dollars with an average discount rate of 3% [19]).

| Soil Order  | SOC Content ( $\text{kg m}^{-2}$ )  | SIC Content ( $\text{kg m}^{-2}$ ) | TSC Content ( $\text{kg m}^{-2}$ ) |
|-------------|-------------------------------------|------------------------------------|------------------------------------|
|             | SOC Value ( $\$ \text{m}^{-2}$ )    | SIC Value ( $\$ \text{m}^{-2}$ )   | TSC Value ( $\$ \text{m}^{-2}$ )   |
|             | Minimum – Midpoint – Maximum Values |                                    |                                    |
| Entisols    | 1.8–8.0–15.8                        | 1.9–4.8–8.4                        | 3.7–12.8–24.2                      |
|             | 0.30–1.35–2.66                      | 0.32–0.82–1.42                     | 0.62–2.17–4.08                     |
| Inceptisols | 2.8–8.9–17.4                        | 2.5–5.1–8.4                        | 5.3–14.0–25.8                      |
|             | 0.47–1.50–2.93                      | 0.42–0.86–1.42                     | 0.89–2.36–4.35                     |
| Histosols   | 63.9–140.1–243.9                    | 0.6–2.4–5.0                        | 64.5–142.5–248.9                   |
|             | 10.78–23.62–41.14                   | 0.10–0.41–0.84                     | 10.88–24.03–41.98                  |
| Andisols    | 4.8–10.7–18.7                       | 0.0–0.0–0.0                        | 4.8–10.7–18.7                      |
|             | 0.81–1.80–3.15                      | 0.00–0.00–0.00                     | 0.81–1.80–3.15                     |
| Aridisols   | 1.2–4.0–7.6                         | 7.0–15.9–27.3                      | 8.2–19.9–34.9                      |
|             | 0.20–0.67–1.28                      | 1.18–2.68–4.60                     | 1.38–3.36–5.89                     |
| Vertisols   | 5.4–14.7–25.5                       | 10.3–23.2–38.3                     | 15.7–37.9–63.8                     |
|             | 0.91–2.48–4.30                      | 1.74–3.91–6.46                     | 2.65–6.39–10.76                    |
| Alfisols    | 2.3–7.5–14.1                        | 1.3–4.3–8.1                        | 3.6–11.8–22.2                      |
|             | 0.39–1.27–2.38                      | 0.22–0.72–1.37                     | 0.61–1.99–3.74                     |
| Mollisols   | 5.9–13.5–22.8                       | 4.9–11.5–19.7                      | 10.8–25.0–42.5                     |
|             | 1.00–2.28–3.85                      | 0.83–1.93–3.32                     | 1.82–4.21–7.17                     |
| Spodosols   | 2.9–12.3–25.5                       | 0.2–0.6–1.1                        | 3.1–12.9–26.6                      |
|             | 0.49–2.07–4.30                      | 0.03–0.10–0.19                     | 0.52–2.17–4.49                     |
| Ultisols    | 1.9–7.1–13.9                        | 0.0–0.0–0.0                        | 1.9–7.1–13.9                       |
|             | 0.32–1.20–2.34                      | 0.00–0.00–0.00                     | 0.32–1.20–2.34                     |

**Table S4.** Distribution of soil carbon regulating ecosystem services in the contiguous United States of America (USA) by soil order in 2016.

| Soil Order              | Soil Organic Carbon (SOC)          |                      |                      | Soil Inorganic Carbon (SIC)        |                      |                      | Total Soil Carbon (TSC)            |                       |                       |
|-------------------------|------------------------------------|----------------------|----------------------|------------------------------------|----------------------|----------------------|------------------------------------|-----------------------|-----------------------|
|                         | (kg), (SC-CO <sub>2</sub> \$, USD) |                      |                      | (kg), (SC-CO <sub>2</sub> \$, USD) |                      |                      | (kg), (SC-CO <sub>2</sub> \$, USD) |                       |                       |
| Area (km <sup>2</sup> ) | Minimum                            | Midpoint             | Maximum              | Minimum                            | Midpoint             | Maximum              | Minimum                            | Midpoint              | Maximum               |
| <b>Entisols</b>         | $1.5 \times 10^{12}$               | $6.6 \times 10^{12}$ | $1.3 \times 10^{13}$ | $1.6 \times 10^{12}$               | $3.9 \times 10^{12}$ | $6.9 \times 10^{12}$ | $3.0 \times 10^{12}$               | $1.50 \times 10^{13}$ | $2.0 \times 10^{13}$  |
| 820,179.8               | \$246.1B                           | \$1.1T               | \$2.2T               | \$262.5B                           | \$672.5B             | \$1.2T               | \$508.5B                           | \$1.8T                | \$3.3T                |
| <b>Inceptisols</b>      | $2.1 \times 10^{12}$               | $6.8 \times 10^{12}$ | $1.3 \times 10^{13}$ | $1.9 \times 10^{12}$               | $3.9 \times 10^{12}$ | $6.4 \times 10^{12}$ | $4.1 \times 10^{12}$               | $1.1 \times 10^{13}$  | $2.0 \times 10^{12}$  |
| 767,051.7               | \$360.5B                           | \$1.2T               | \$2.2T               | \$322.2B                           | \$659.7B             | \$1.1T               | \$682.7B                           | \$1.8T                | \$3.3T                |
| <b>Histosols</b>        | $6.2 \times 10^{12}$               | $1.4 \times 10^{13}$ | $2.4 \times 10^{13}$ | $5.8 \times 10^{10}$               | $2.3 \times 10^{11}$ | $4.9 \times 10^{11}$ | $6.3 \times 10^{12}$               | $1.4 \times 10^{13}$  | $2.4 \times 10^{13}$  |
| 97,224.9                | \$1.0T                             | \$2.3T               | \$4.0T               | \$9.7B                             | \$39.9B              | \$81.7B              | \$1.1T                             | \$2.3T                | \$4.1T                |
| <b>Andisols</b>         | $2.8 \times 10^{11}$               | $6.2 \times 10^{11}$ | $1.1 \times 10^{12}$ | 0.0                                | 0.0                  | 0.0                  | $2.8 \times 10^{11}$               | $6.2 \times 10^{11}$  | $1.51 \times 10^{12}$ |
| 57,761.2                | \$46.8B                            | \$104.0B             | \$181.9B             | \$0.0                              | \$0.0                | \$0.0                | \$46.8B                            | \$104.0B              | \$181.9B              |
| <b>Aridisols</b>        | $6.5 \times 10^{11}$               | $2.2 \times 10^{12}$ | $4.1 \times 10^{12}$ | $3.8 \times 10^{12}$               | $8.6 \times 10^{12}$ | $1.5 \times 10^{13}$ | $4.4 \times 10^{12}$               | $1.1 \times 10^{13}$  | $1.9 \times 10^{13}$  |
| 538,450.4               | \$107.7B                           | \$360.8B             | \$689.2B             | \$635.4B                           | \$1.4T               | \$2.5T               | \$743.1B                           | \$1.8T                | \$3.2T                |
| <b>Vertisols</b>        | $7.8 \times 10^{11}$               | $2.1 \times 10^{12}$ | $3.7 \times 10^{12}$ | $1.5 \times 10^{12}$               | $3.4 \times 10^{12}$ | $5.6 \times 10^{12}$ | $2.3 \times 10^{12}$               | $5.5 \times 10^{12}$  | $9.3 \times 10^{12}$  |
| 145,189.9               | \$132.1B                           | \$360.1B             | \$624.3B             | \$252.6B                           | \$567.7B             | \$937.9B             | \$384.8B                           | \$927.8B              | \$1.6T                |
| <b>Alfisols</b>         | $2.4 \times 10^{12}$               | $7.9 \times 10^{12}$ | $1.5 \times 10^{13}$ | $1.4 \times 10^{12}$               | $4.5 \times 10^{12}$ | $8.5 \times 10^{12}$ | $3.8 \times 10^{12}$               | $1.2 \times 10^{13}$  | $2.3 \times 10^{13}$  |
| 1,053,727.4             | \$411.0B                           | \$1.3T               | \$2.5T               | \$231.8B                           | \$758.7B             | \$1.4T               | \$642.8B                           | \$2.1T                | \$3.9T                |
| <b>Mollisols</b>        | $1.0 \times 10^{13}$               | $2.3 \times 10^{13}$ | $3.9 \times 10^{13}$ | $8.3 \times 10^{12}$               | $2.0 \times 10^{13}$ | $3.3 \times 10^{13}$ | $1.8 \times 10^{13}$               | $4.2 \times 10^{13}$  | $7.2 \times 10^{13}$  |
| 1,698,974.9             | \$1.7T                             | \$3.9T               | \$6.5T               | \$1.4T                             | \$3.3T               | \$5.6T               | \$3.1T                             | \$7.2T                | \$12.2T               |
| <b>Spodosols</b>        | $6.0 \times 10^{11}$               | $2.6 \times 10^{12}$ | $5.3 \times 10^{12}$ | $4.2 \times 10^{10}$               | $1.2 \times 10^{11}$ | $2.3 \times 10^{11}$ | $6.4 \times 10^{11}$               | $2.7 \times 10^{12}$  | $5.5 \times 10^{12}$  |
| 207,924.4               | \$101.9B                           | \$430.4B             | \$894.1B             | \$6.2B                             | \$20.8B              | \$39.5B              | \$108.1B                           | \$451.2B              | \$933.6B              |
| <b>Ultisols</b>         | $1.4 \times 10^{12}$               | $5.2 \times 10^{12}$ | $1.0 \times 10^{13}$ | 0.0                                | 0.0                  | 0.0                  | $1.4 \times 10^{12}$               | $5.2 \times 10^{12}$  | $1.0 \times 10^{13}$  |
| 734,424.0               | \$235.0B                           | \$881.3B             | \$1.7T               | \$0.0                              | \$0.0                | \$0.0                | \$235.0B                           | \$881.3B              | \$1.7T                |
| <b>2016 Total</b>       | $2.6 \times 10^{13}$               | $7.1 \times 10^{13}$ | $1.3 \times 10^{14}$ | $1.9 \times 10^{13}$               | $4.4 \times 10^{13}$ | $7.6 \times 10^{13}$ | $4.5 \times 10^{13}$               | $1.1 \times 10^{14}$  | $2.0 \times 10^{14}$  |
| 6,120,908.6             | \$4.4T                             | \$11.9T              | \$21.6T              | \$3.1T                             | \$7.4T               | \$12.9T              | \$7.5T                             | \$19.3T               | \$34.5T               |

**Table S5.** Total soil carbon (C) and associated social costs of C by state in the contiguous United States of America (USA) for 2016.

| State (Region)           | Land Area (km <sup>2</sup> ) | Minimum TSC Loss (kg)                  | Midpoint TSC Loss (kg)                 | Maximum TSC Loss (kg)                  | Minimum SC-CO <sub>2</sub> (\$, USD) | Midpoint SC-CO <sub>2</sub> (\$, USD) | Maximum SC-CO <sub>2</sub> (\$, USD) |
|--------------------------|------------------------------|----------------------------------------|----------------------------------------|----------------------------------------|--------------------------------------|---------------------------------------|--------------------------------------|
| Connecticut (CT)         | 12,187.5                     | $7.7 \times 10^{10}$                   | $2.0 \times 10^{11}$                   | $3.7 \times 10^{11}$                   | \$13.0B                              | \$34.1B                               | \$62.3B                              |
| Delaware (DE)            | 4028.1                       | $1.3 \times 10^{10}$                   | $4.1 \times 10^{10}$                   | $7.7 \times 10^{10}$                   | \$2.1B                               | \$6.9B                                | \$13.0B                              |
| Massachusetts (MA)       | 17,316.5                     | $1.4 \times 10^{11}$                   | $3.5 \times 10^{11}$                   | $6.5 \times 10^{11}$                   | \$22.7B                              | \$59.8B                               | \$101.6B                             |
| Maryland (MD)            | 22,691.2                     | $8.0 \times 10^{10}$                   | $2.5 \times 10^{11}$                   | $4.6 \times 10^{11}$                   | \$13.4B                              | \$41.4B                               | \$78.0B                              |
| Maine (ME)               | 76,374.8                     | $6.4 \times 10^{11}$                   | $1.8 \times 10^{12}$                   | $3.3 \times 10^{12}$                   | \$107.2B                             | \$295.9B                              | \$556.3B                             |
| New Hampshire (NH)       | 18,869.5                     | $1.6 \times 10^{11}$                   | $4.3 \times 10^{11}$                   | $8.1 \times 10^{11}$                   | \$26.9B                              | \$72.9B                               | \$136.1B                             |
| New Jersey (NJ)          | 17,375.0                     | $9.4 \times 10^{10}$                   | $2.7 \times 10^{11}$                   | $4.9 \times 10^{11}$                   | \$15.9B                              | \$45.0B                               | \$83.4B                              |
| New York (NY)            | 120,649.8                    | $7.5 \times 10^{11}$                   | $2.1 \times 10^{12}$                   | $3.8 \times 10^{12}$                   | \$127.0B                             | \$348.8B                              | \$647.5B                             |
| Pennsylvania (PA)        | 109,568.2                    | $4.2 \times 10^{11}$                   | $1.2 \times 10^{12}$                   | $2.3 \times 10^{12}$                   | \$70.2B                              | \$209.8B                              | \$393.2B                             |
| Rhode Island (RI)        | 2650.7                       | $3.3 \times 10^{10}$                   | $8.0 \times 10^{10}$                   | $1.4 \times 10^{11}$                   | \$5.6B                               | \$13.4B                               | \$24.0B                              |
| Vermont (VT)             | 23,155.2                     | $1.3 \times 10^{11}$                   | $3.9 \times 10^{11}$                   | $7.4 \times 10^{11}$                   | \$21.8B                              | \$65.3B                               | \$125.1B                             |
| West Virginia (WV)       | 61,630.9                     | $2.3 \times 10^{11}$                   | $6.9 \times 10^{11}$                   | $1.3 \times 10^{12}$                   | \$37.9B                              | \$115.9B                              | \$217.8B                             |
| <b>(East)</b>            | <b>486,497.4</b>             | <b><math>2.8 \times 10^{12}</math></b> | <b><math>7.8 \times 10^{12}</math></b> | <b><math>1.5 \times 10^{13}</math></b> | <b>\$463.9B</b>                      | <b>\$1.3T</b>                         | <b>\$2.4T</b>                        |
| Iowa (IA)                | 142,800.9                    | $1.2 \times 10^{12}$                   | $2.9 \times 10^{12}$                   | $5.0 \times 10^{12}$                   | \$197.9B                             | \$487.9B                              | \$850.7B                             |
| Illinois (IL)            | 124,103.1                    | $8.9 \times 10^{11}$                   | $2.3 \times 10^{12}$                   | $4.1 \times 10^{12}$                   | \$149.9B                             | \$386.9B                              | \$684.7B                             |
| Indiana (IN)             | 82,791.3                     | $5.9 \times 10^{11}$                   | $1.5 \times 10^{12}$                   | $2.8 \times 10^{12}$                   | \$100.1B                             | \$261.2B                              | \$467.3B                             |
| Michigan (MI)            | 143,913.1                    | $1.4 \times 10^{12}$                   | $3.7 \times 10^{12}$                   | $6.8 \times 10^{12}$                   | \$239.9B                             | \$625.2B                              | \$1.1T                               |
| Minnesota (MN)           | 165,505.4                    | $2.6 \times 10^{12}$                   | $6.0 \times 10^{12}$                   | $1.1 \times 10^{13}$                   | \$435.1B                             | \$1.0T                                | \$1.8T                               |
| Missouri (MO)            | 171,155.5                    | $8.9 \times 10^{11}$                   | $2.5 \times 10^{12}$                   | $4.5 \times 10^{12}$                   | \$149.9B                             | \$419.3B                              | \$758.0B                             |
| Ohio (OH)                | 80,089.4                     | $4.1 \times 10^{11}$                   | $1.2 \times 10^{12}$                   | $2.1 \times 10^{12}$                   | \$69.0B                              | \$195.2B                              | \$355.6B                             |
| Wisconsin (WI)           | 120,559.1                    | $1.3 \times 10^{12}$                   | $3.3 \times 10^{12}$                   | $5.9 \times 10^{12}$                   | \$216.0B                             | \$549.0B                              | \$990.2B                             |
| <b>(Midwest)</b>         | <b>1,030,917.8</b>           | <b><math>9.2 \times 10^{12}</math></b> | <b><math>2.3 \times 10^{13}</math></b> | <b><math>4.2 \times 10^{13}</math></b> | <b>\$1.6T</b>                        | <b>\$3.9T</b>                         | <b>\$7.0T</b>                        |
| Arkansas (AR)            | 95,870.2                     | $3.6 \times 10^{11}$                   | $1.1 \times 10^{12}$                   | $2.0 \times 10^{12}$                   | \$60.7B                              | \$185.0B                              | \$342.6B                             |
| Louisiana (LA)           | 73,743.3                     | $8.3 \times 10^{11}$                   | $2.1 \times 10^{12}$                   | $3.7 \times 10^{12}$                   | \$140.7B                             | \$347.4B                              | \$616.6B                             |
| Oklahoma (OK)            | 169,478.5                    | $1.2 \times 10^{12}$                   | $3.1 \times 10^{12}$                   | $5.5 \times 10^{12}$                   | \$207.7B                             | \$529.5B                              | \$931.9B                             |
| Texas (TX)               | 554,287.9                    | $4.3 \times 10^{12}$                   | $1.1 \times 10^{13}$                   | $1.9 \times 10^{13}$                   | \$720.8B                             | \$1.8T                                | \$3.2T                               |
| <b>(South Central)</b>   | <b>893,379.9</b>             | <b><math>6.7 \times 10^{12}</math></b> | <b><math>1.7 \times 10^{13}</math></b> | <b><math>3.0 \times 10^{13}</math></b> | <b>\$1.1T</b>                        | <b>\$2.9T</b>                         | <b>\$5.1T</b>                        |
| Alabama (AL)             | 128,955.7                    | $5.0 \times 10^{11}$                   | $1.5 \times 10^{12}$                   | $2.8 \times 10^{12}$                   | \$84.3B                              | \$254.8B                              | \$474.3B                             |
| Florida (FL)             | 127,954.3                    | $1.2 \times 10^{12}$                   | $3.1 \times 10^{12}$                   | $5.6 \times 10^{12}$                   | \$196.4B                             | \$514.9B                              | \$939.9B                             |
| Georgia (GA)             | 146,565.1                    | $4.5 \times 10^{11}$                   | $1.4 \times 10^{12}$                   | $2.8 \times 10^{12}$                   | \$75.5B                              | \$244.2B                              | \$464.6B                             |
| Kentucky (KY)            | 94,589.6                     | $3.7 \times 10^{11}$                   | $1.1 \times 10^{12}$                   | $2.1 \times 10^{12}$                   | \$61.7B                              | \$187.4B                              | \$349.9B                             |
| Mississippi (MS)         | 110,009.8                    | $4.2 \times 10^{11}$                   | $1.3 \times 10^{12}$                   | $2.5 \times 10^{12}$                   | \$71.4B                              | \$221.3B                              | \$414.5B                             |
| North Carolina (NC)      | 121,473.1                    | $6.1 \times 10^{11}$                   | $1.7 \times 10^{12}$                   | $3.1 \times 10^{12}$                   | \$102.5B                             | \$286.4B                              | \$530.2B                             |
| South Carolina (SC)      | 76,271.4                     | $2.3 \times 10^{11}$                   | $7.4 \times 10^{11}$                   | $1.4 \times 10^{12}$                   | \$38.0B                              | \$124.4B                              | \$236.6B                             |
| Tennessee (TN)           | 100,658.9                    | $3.5 \times 10^{11}$                   | $1.1 \times 10^{12}$                   | $2.0 \times 10^{12}$                   | \$59.3B                              | \$183.6B                              | \$344.2B                             |
| Virginia (VA)            | 96,823.4                     | $3.0 \times 10^{11}$                   | $9.4 \times 10^{11}$                   | $1.8 \times 10^{12}$                   | \$49.9B                              | \$159.4B                              | \$302.2B                             |
| <b>(Southeast)</b>       | <b>1,003,301.3</b>           | <b><math>4.4 \times 10^{12}</math></b> | <b><math>1.3 \times 10^{13}</math></b> | <b><math>2.4 \times 10^{13}</math></b> | <b>\$739.0B</b>                      | <b>\$2.2T</b>                         | <b>\$4.1T</b>                        |
| Colorado (CO)            | 171,822.3                    | $1.3 \times 10^{12}$                   | $3.2 \times 10^{12}$                   | $5.7 \times 10^{12}$                   | \$213.4B                             | \$546.9B                              | \$965.4B                             |
| Kansas (KS)              | 205,150.7                    | $2.1 \times 10^{12}$                   | $4.9 \times 10^{12}$                   | $8.4 \times 10^{12}$                   | \$349.9B                             | \$830.9B                              | \$1.4T                               |
| Montana (MT)             | 323,266.0                    | $2.3 \times 10^{12}$                   | $6.0 \times 10^{12}$                   | $1.1 \times 10^{13}$                   | \$390.4B                             | \$1.0T                                | \$1.8T                               |
| North Dakota (ND)        | 173,521.7                    | $1.8 \times 10^{12}$                   | $4.2 \times 10^{12}$                   | $7.2 \times 10^{12}$                   | \$301.4B                             | \$709.3B                              | \$1.2T                               |
| Nebraska (NE)            | 196,358.9                    | $1.4 \times 10^{12}$                   | $3.7 \times 10^{12}$                   | $6.6 \times 10^{12}$                   | \$244.0B                             | \$632.1B                              | \$1.1T                               |
| South Dakota (SD)        | 188,137.8                    | $1.8 \times 10^{12}$                   | $4.4 \times 10^{12}$                   | $7.5 \times 10^{12}$                   | \$304.4B                             | \$738.1B                              | \$1.3T                               |
| Wyoming (WY)             | 150,210.1                    | $1.0 \times 10^{12}$                   | $2.6 \times 10^{12}$                   | $4.7 \times 10^{12}$                   | \$169.0B                             | \$444.4B                              | \$792.1B                             |
| <b>(Northern Plains)</b> | <b>1,408,467.5</b>           | <b><math>1.2 \times 10^{13}</math></b> | <b><math>2.9 \times 10^{13}</math></b> | <b><math>5.1 \times 10^{13}</math></b> | <b>\$2.0T</b>                        | <b>\$4.9T</b>                         | <b>\$8.6T</b>                        |
| Arizona (AZ)             | 132,140.5                    | $9.4 \times 10^{11}$                   | $2.4 \times 10^{12}$                   | $4.3 \times 10^{12}$                   | \$158.5B                             | \$411.2B                              | \$728.5B                             |
| California (CA)          | 162,868.8                    | $1.1 \times 10^{12}$                   | $2.9 \times 10^{12}$                   | $5.1 \times 10^{12}$                   | \$182.6B                             | \$481.2B                              | \$858.7B                             |
| Idaho (ID)               | 147,410.2                    | $1.2 \times 10^{12}$                   | $3.0 \times 10^{12}$                   | $5.2 \times 10^{12}$                   | \$207.9B                             | \$500.3B                              | \$871.1B                             |
| New Mexico (NM)          | 254,081.7                    | $1.9 \times 10^{12}$                   | $4.8 \times 10^{12}$                   | $8.4 \times 10^{12}$                   | \$316.3B                             | \$806.3B                              | \$1.4T                               |
| Nevada (NV)              | 230,411.5                    | $1.8 \times 10^{12}$                   | $4.4 \times 10^{12}$                   | $7.8 \times 10^{12}$                   | \$295.9B                             | \$748.9B                              | \$1.3T                               |
| Oregon (OR)              | 155,974.2                    | $1.2 \times 10^{12}$                   | $2.9 \times 10^{12}$                   | $5.1 \times 10^{12}$                   | \$203.2B                             | \$494.6B                              | \$865.4B                             |
| Utah (UT)                | 102,726.2                    | $7.3 \times 10^{11}$                   | $1.9 \times 10^{12}$                   | $3.4 \times 10^{12}$                   | \$123.3B                             | \$319.9B                              | \$566.0B                             |
| Washington (WA)          | 112,731.5                    | $8.9 \times 10^{11}$                   | $2.2 \times 10^{12}$                   | $3.8 \times 10^{12}$                   | \$150.4B                             | \$366.4B                              | \$645.5B                             |
| <b>(West)</b>            | <b>1,298,344.6</b>           | <b><math>9.7 \times 10^{12}</math></b> | <b><math>2.4 \times 10^{13}</math></b> | <b><math>4.3 \times 10^{13}</math></b> | <b>\$1.6T</b>                        | <b>\$4.1T</b>                         | <b>\$7.3T</b>                        |
| <b>Total</b>             | <b>6,120,908.5</b>           | <b><math>4.5 \times 10^{13}</math></b> | <b><math>1.1 \times 10^{14}</math></b> | <b><math>2.0 \times 10^{14}</math></b> | <b>\$7.5T</b>                        | <b>\$19.3T</b>                        | <b>\$34.4T</b>                       |

Note: M = million =  $10^6$ , B = billion =  $10^9$ , T = trillion =  $10^{12}$ .



**Table S6.** Developed land, potential for soil carbon (C) loss, and realized social costs of C by state in the contiguous United States of America (USA) for all developments prior and through 2016. Because some of the land development would have preceded the establishment of soil databases, the calculated results underestimate true values.

| State (Region)           | Developed Area (km <sup>2</sup> ) | Minimum TSC Loss (kg)        | Midpoint TSC Loss (kg)       | Maximum TSC Loss (kg)        | Minimum SC-CO <sub>2</sub> (\$ USD) | Midpoint SC-CO <sub>2</sub> (\$ USD) | Maximum SC-CO <sub>2</sub> (\$ USD) |
|--------------------------|-----------------------------------|------------------------------|------------------------------|------------------------------|-------------------------------------|--------------------------------------|-------------------------------------|
| Connecticut (CT)         | 2752.9                            | 1.4 × 10 <sup>10</sup>       | 4.0 × 10 <sup>10</sup>       | 7.3 × 10 <sup>10</sup>       | \$2.4B                              | \$6.7B                               | \$12.3B                             |
| Delaware (DE)            | 643.3                             | 1.8 × 10 <sup>9</sup>        | 6.1 × 10 <sup>9</sup>        | 1.2 × 10 <sup>10</sup>       | \$302.4M                            | \$1.0B                               | \$2.0B                              |
| Massachusetts (MA)       | 4179.3                            | 2.5 × 10 <sup>10</sup>       | 6.8 × 10 <sup>10</sup>       | 1.3 × 10 <sup>11</sup>       | \$4.1B                              | \$11.5B                              | \$21.1B                             |
| Maryland (MD)            | 3803.6                            | 1.0 × 10 <sup>10</sup>       | 3.5 × 10 <sup>10</sup>       | 6.6 × 10 <sup>10</sup>       | \$1.7B                              | \$5.9B                               | \$11.2B                             |
| Maine (ME)               | 3402.5                            | 1.9 × 10 <sup>10</sup>       | 5.7 × 10 <sup>10</sup>       | 1.1 × 10 <sup>11</sup>       | \$3.2B                              | \$9.7B                               | \$18.7B                             |
| New Hampshire (NH)       | 1769.0                            | 1.6 × 10 <sup>10</sup>       | 4.2 × 10 <sup>10</sup>       | 7.8 × 10 <sup>10</sup>       | \$2.7B                              | \$7.1B                               | \$13.1B                             |
| New Jersey (NJ)          | 5094.8                            | 2.1 × 10 <sup>10</sup>       | 6.3 × 10 <sup>10</sup>       | 1.2 × 10 <sup>11</sup>       | \$3.5B                              | \$10.7B                              | \$20.1B                             |
| New York (NY)            | 12,037.6                          | 5.9 × 10 <sup>10</sup>       | 1.7 × 10 <sup>11</sup>       | 3.1 × 10 <sup>11</sup>       | \$9.9B                              | \$28.4B                              | \$52.8B                             |
| Pennsylvania (PA)        | 12,834.1                          | 4.6 × 10 <sup>10</sup>       | 1.4 × 10 <sup>11</sup>       | 2.7 × 10 <sup>11</sup>       | \$7.8B                              | \$24.0B                              | \$45.2B                             |
| Rhode Island (RI)        | 789.3                             | 5.3 × 10 <sup>9</sup>        | 1.4 × 10 <sup>10</sup>       | 2.5 × 10 <sup>10</sup>       | \$896.3M                            | \$2.3B                               | \$4.3B                              |
| Vermont (VT)             | 1396.7                            | 7.4 × 10 <sup>9</sup>        | 2.2 × 10 <sup>10</sup>       | 4.2 × 10 <sup>10</sup>       | \$1.2B                              | \$3.7B                               | \$7.0B                              |
| West Virginia (WV)       | 3686.6                            | 1.3 × 10 <sup>10</sup>       | 4.2 × 10 <sup>10</sup>       | 7.9 × 10 <sup>10</sup>       | \$2.3B                              | \$7.0B                               | \$13.2B                             |
| <b>(East)</b>            | <b>52,389.7</b>                   | <b>2.4 × 10<sup>11</sup></b> | <b>7.0 × 10<sup>11</sup></b> | <b>1.3 × 10<sup>12</sup></b> | <b>\$40.0B</b>                      | <b>\$118.0B</b>                      | <b>\$221.0B</b>                     |
| Iowa (IA)                | 8385.9                            | 6.9 × 10 <sup>10</sup>       | 1.7 × 10 <sup>11</sup>       | 3.0 × 10 <sup>11</sup>       | \$11.7B                             | \$28.8B                              | \$50.2B                             |
| Illinois (IL)            | 13,361.0                          | 9.5 × 10 <sup>10</sup>       | 2.5 × 10 <sup>11</sup>       | 4.4 × 10 <sup>11</sup>       | \$16.0B                             | \$41.8B                              | \$74.1B                             |
| Indiana (IN)             | 8154.0                            | 5.5 × 10 <sup>10</sup>       | 1.5 × 10 <sup>11</sup>       | 2.6 × 10 <sup>11</sup>       | \$9.3B                              | \$24.5B                              | \$43.8B                             |
| Michigan (MI)            | 14,262.3                          | 9.5 × 10 <sup>10</sup>       | 2.6 × 10 <sup>11</sup>       | 4.9 × 10 <sup>11</sup>       | \$16.0B                             | \$44.7B                              | \$82.2B                             |
| Minnesota (MN)           | 8541.2                            | 8.4 × 10 <sup>10</sup>       | 2.0 × 10 <sup>11</sup>       | 3.6 × 10 <sup>11</sup>       | \$14.2B                             | \$34.4B                              | \$60.2B                             |
| Missouri (MO)            | 10,351.0                          | 5.5 × 10 <sup>10</sup>       | 1.5 × 10 <sup>11</sup>       | 2.8 × 10 <sup>11</sup>       | \$9.3B                              | \$25.8B                              | \$46.6B                             |
| Ohio (OH)                | 10,116.3                          | 4.9 × 10 <sup>10</sup>       | 1.4 × 10 <sup>11</sup>       | 2.6 × 10 <sup>11</sup>       | \$8.2B                              | \$23.9B                              | \$43.9B                             |
| Wisconsin (WI)           | 8223.4                            | 5.7 × 10 <sup>10</sup>       | 1.6 × 10 <sup>11</sup>       | 2.8 × 10 <sup>11</sup>       | \$9.7B                              | \$26.2B                              | \$47.6B                             |
| <b>(Midwest)</b>         | <b>81,395.1</b>                   | <b>5.6 × 10<sup>11</sup></b> | <b>1.5 × 10<sup>12</sup></b> | <b>2.7 × 10<sup>12</sup></b> | <b>\$94.4B</b>                      | <b>\$250.3B</b>                      | <b>\$448.7B</b>                     |
| Arkansas (AR)            | 5723.5                            | 1.8 × 10 <sup>10</sup>       | 5.7 × 10 <sup>10</sup>       | 1.1 × 10 <sup>11</sup>       | \$3.0B                              | \$9.6B                               | \$18.1B                             |
| Louisiana (LA)           | 5402.4                            | 3.6 × 10 <sup>10</sup>       | 9.8 × 10 <sup>10</sup>       | 1.7 × 10 <sup>11</sup>       | \$6.1B                              | \$16.5B                              | \$29.5B                             |
| Oklahoma (OK)            | 8743.7                            | 6.8 × 10 <sup>10</sup>       | 1.7 × 10 <sup>11</sup>       | 3.0 × 10 <sup>11</sup>       | \$11.5B                             | \$28.8B                              | \$50.4B                             |
| Texas (TX)               | 29,898.7                          | 2.4 × 10 <sup>11</sup>       | 6.1 × 10 <sup>11</sup>       | 1.1 × 10 <sup>12</sup>       | \$40.2B                             | \$102.4B                             | \$179.1B                            |
| <b>(South Central)</b>   | <b>49,768.3</b>                   | <b>3.6 × 10<sup>11</sup></b> | <b>9.3 × 10<sup>11</sup></b> | <b>1.6 × 10<sup>12</sup></b> | <b>\$60.7B</b>                      | <b>\$157.3B</b>                      | <b>\$277.1B</b>                     |
| Alabama (AL)             | 8845.2                            | 2.8 × 10 <sup>10</sup>       | 8.8 × 10 <sup>10</sup>       | 1.7 × 10 <sup>11</sup>       | \$4.6B                              | \$14.9B                              | \$28.2B                             |
| Florida (FL)             | 20,249.6                          | 9.5 × 10 <sup>10</sup>       | 3.0 × 10 <sup>11</sup>       | 5.6 × 10 <sup>11</sup>       | \$16.0B                             | \$50.3B                              | \$95.3B                             |
| Georgia (GA)             | 13,631.1                          | 3.0 × 10 <sup>10</sup>       | 1.1 × 10 <sup>11</sup>       | 2.1 × 10 <sup>11</sup>       | \$5.1B                              | \$18.3B                              | \$35.6B                             |
| Kentucky (KY)            | 6725.8                            | 2.5 × 10 <sup>10</sup>       | 7.8 × 10 <sup>10</sup>       | 1.5 × 10 <sup>11</sup>       | \$4.2B                              | \$13.1B                              | \$24.5B                             |
| Mississippi (MS)         | 6786.4                            | 2.3 × 10 <sup>10</sup>       | 7.3 × 10 <sup>10</sup>       | 1.4 × 10 <sup>11</sup>       | \$3.8B                              | \$12.4B                              | \$23.4B                             |
| North Carolina (NC)      | 13,132.1                          | 3.7 × 10 <sup>10</sup>       | 1.2 × 10 <sup>11</sup>       | 2.4 × 10 <sup>11</sup>       | \$6.3B                              | \$20.9B                              | \$40.0B                             |
| South Carolina (SC)      | 7893.2                            | 1.9 × 10 <sup>10</sup>       | 6.7 × 10 <sup>10</sup>       | 1.3 × 10 <sup>11</sup>       | \$3.2B                              | \$11.3B                              | \$21.8B                             |
| Tennessee (TN)           | 9504.4                            | 3.2 × 10 <sup>10</sup>       | 1.1 × 10 <sup>11</sup>       | 1.9 × 10 <sup>11</sup>       | \$5.4B                              | \$17.1B                              | \$32.2B                             |
| Virginia (VA)            | 8784.1                            | 2.4 × 10 <sup>10</sup>       | 8.0 × 10 <sup>10</sup>       | 1.5 × 10 <sup>11</sup>       | \$4.0B                              | \$13.5B                              | \$25.8B                             |
| <b>(Southeast)</b>       | <b>95,551.9</b>                   | <b>3.1 × 10<sup>11</sup></b> | <b>1.0 × 10<sup>12</sup></b> | <b>1.9 × 10<sup>12</sup></b> | <b>\$52.6B</b>                      | <b>\$171.9B</b>                      | <b>\$326.6B</b>                     |
| Colorado (CO)            | 4702.3                            | 3.8 × 10 <sup>10</sup>       | 9.5 × 10 <sup>10</sup>       | 1.7 × 10 <sup>11</sup>       | \$6.4B                              | \$15.9B                              | \$27.9B                             |
| Kansas (KS)              | 9615.0                            | 9.9 × 10 <sup>10</sup>       | 2.3 × 10 <sup>11</sup>       | 4.0 × 10 <sup>11</sup>       | \$16.6B                             | \$39.3B                              | \$67.2B                             |
| Montana (MT)             | 3631.5                            | 2.8 × 10 <sup>10</sup>       | 7.1 × 10 <sup>10</sup>       | 1.2 × 10 <sup>11</sup>       | \$4.7B                              | \$11.9B                              | \$20.9B                             |
| North Dakota (ND)        | 6016.4                            | 6.3 × 10 <sup>10</sup>       | 1.5 × 10 <sup>11</sup>       | 2.5 × 10 <sup>11</sup>       | \$10.6B                             | \$25.1B                              | \$42.8B                             |
| Nebraska (NE)            | 5957.7                            | 5.1 × 10 <sup>10</sup>       | 1.3 × 10 <sup>11</sup>       | 2.2 × 10 <sup>11</sup>       | \$8.6B                              | \$21.2B                              | \$36.9B                             |
| South Dakota (SD)        | 4728.8                            | 4.9 × 10 <sup>10</sup>       | 1.2 × 10 <sup>11</sup>       | 2.0 × 10 <sup>11</sup>       | \$8.2B                              | \$19.4B                              | \$33.2B                             |
| Wyoming (WY)             | 1142.2                            | 8.0 × 10 <sup>9</sup>        | 2.1 × 10 <sup>10</sup>       | 3.7 × 10 <sup>10</sup>       | \$1.3B                              | \$3.5B                               | \$6.2B                              |
| <b>(Northern Plains)</b> | <b>35,793.9</b>                   | <b>3.4 × 10<sup>11</sup></b> | <b>8.1 × 10<sup>11</sup></b> | <b>1.4 × 10<sup>12</sup></b> | <b>\$56.6B</b>                      | <b>\$136.3B</b>                      | <b>\$235.2B</b>                     |
| Arizona (AZ)             | 4432.9                            | 3.0 × 10 <sup>10</sup>       | 7.9 × 10 <sup>10</sup>       | 1.4 × 10 <sup>11</sup>       | \$5.1B                              | \$13.4B                              | \$23.8B                             |
| California (CA)          | 11,786.1                          | 8.0 × 10 <sup>10</sup>       | 2.1 × 10 <sup>11</sup>       | 3.8 × 10 <sup>11</sup>       | \$13.5B                             | \$35.9B                              | \$63.7B                             |
| Idaho (ID)               | 3010.8                            | 2.6 × 10 <sup>10</sup>       | 4.1 × 10 <sup>10</sup>       | 1.1 × 10 <sup>11</sup>       | \$4.3B                              | \$10.4B                              | \$18.2B                             |
| New Mexico (NM)          | 3392.5                            | 2.4 × 10 <sup>10</sup>       | 6.3 × 10 <sup>10</sup>       | 1.1 × 10 <sup>11</sup>       | \$4.1B                              | \$10.6B                              | \$18.8B                             |
| Nevada (NV)              | 2709.0                            | 2.0 × 10 <sup>10</sup>       | 5.0 × 10 <sup>10</sup>       | 8.9 × 10 <sup>10</sup>       | \$3.3B                              | \$8.5B                               | \$15.1B                             |
| Oregon (OR)              | 5824.1                            | 4.0 × 10 <sup>10</sup>       | 1.0 × 10 <sup>11</sup>       | 1.8 × 10 <sup>11</sup>       | \$7.0B                              | \$17.5B                              | \$30.8B                             |
| Utah (UT)                | 2141.5                            | 1.8 × 10 <sup>10</sup>       | 4.4 × 10 <sup>10</sup>       | 7.7 × 10 <sup>10</sup>       | \$3.0B                              | \$7.4B                               | \$13.0B                             |
| Washington (WA)          | 7392.7                            | 7.8 × 10 <sup>10</sup>       | 1.9 × 10 <sup>11</sup>       | 3.3 × 10 <sup>11</sup>       | \$13.2B                             | \$31.6B                              | \$55.8B                             |
| <b>(West)</b>            | <b>40,689.6</b>                   | <b>3.2 × 10<sup>11</sup></b> | <b>7.8 × 10<sup>11</sup></b> | <b>1.4 × 10<sup>12</sup></b> | <b>\$53.5B</b>                      | <b>\$135.3B</b>                      | <b>\$239.2B</b>                     |
| <b>Total</b>             | <b>355,588.5</b>                  | <b>2.1 × 10<sup>12</sup></b> | <b>5.7 × 10<sup>12</sup></b> | <b>1.0 × 10<sup>13</sup></b> | <b>\$357.9B</b>                     | <b>\$969.2B</b>                      | <b>\$1.7T</b>                       |

Note: M = million = 10<sup>6</sup>, B = billion = 10<sup>9</sup>, T = trillion = 10<sup>12</sup>.

**Table S7.** Developed land, potential for soil carbon (C) loss, and realized social costs of C by state in the contiguous United States of America (USA) for all developments between 2001 and 2016.

| State (Region)           | Developed Area (km <sup>2</sup> ) | Minimum TSC Loss (kg)                  | Midpoint TSC Loss (kg)                 | Maximum TSC Loss (kg)                  | Minimum SC-CO <sub>2</sub> (\$ = USD) | Midpoint SC-CO <sub>2</sub> (\$, USD) | Maximum SC-CO <sub>2</sub> (\$, USD) |
|--------------------------|-----------------------------------|----------------------------------------|----------------------------------------|----------------------------------------|---------------------------------------|---------------------------------------|--------------------------------------|
| Connecticut (CT)         | 159.1                             | $8.3 \times 10^8$                      | $2.3 \times 10^9$                      | $4.2 \times 10^9$                      | \$139.5M                              | \$384.8M                              | \$709.9M                             |
| Delaware (DE)            | 90.3                              | $2.2 \times 10^8$                      | $7.7 \times 10^8$                      | $1.5 \times 10^9$                      | \$37.8M                               | \$130.8M                              | \$250.8M                             |
| Massachusetts (MA)       | 316.0                             | $2.1 \times 10^9$                      | $5.5 \times 10^9$                      | $1.0 \times 10^{10}$                   | \$348.5M                              | \$932.7M                              | \$1.7B                               |
| Maryland (MD)            | 248.4                             | $6.5 \times 10^8$                      | $2.4 \times 10^9$                      | $4.3 \times 10^9$                      | \$110.3M                              | \$376.7M                              | \$720.4M                             |
| Maine (ME)               | 74.1                              | $3.5 \times 10^8$                      | $1.1 \times 10^9$                      | $2.2 \times 10^9$                      | \$59.1M                               | \$194.4M                              | \$365.5M                             |
| New Hampshire (NH)       | 107.5                             | $1.6 \times 10^9$                      | $3.8 \times 10^9$                      | $6.9 \times 10^9$                      | \$269.6M                              | \$648.0M                              | \$1.1B                               |
| New Jersey (NJ)          | 389.7                             | $1.3 \times 10^9$                      | $4.3 \times 10^9$                      | $3.4 \times 10^9$                      | \$227.2M                              | \$722.2M                              | \$1.4B                               |
| New York (NY)            | 485.2                             | $2.2 \times 10^9$                      | $6.6 \times 10^9$                      | $1.2 \times 10^{10}$                   | \$386.3M                              | \$1.1B                                | \$2.1B                               |
| Pennsylvania (PA)        | 674.8                             | $2.4 \times 10^9$                      | $7.5 \times 10^9$                      | $1.5 \times 10^{10}$                   | \$405.6M                              | \$1.3B                                | \$2.4B                               |
| Rhode Island (RI)        | 40.8                              | $3.7 \times 10^8$                      | $9.3 \times 10^8$                      | $1.7 \times 10^9$                      | \$62.9M                               | \$157.0M                              | \$282.0M                             |
| Vermont (VT)             | 25.3                              | $1.3 \times 10^8$                      | $3.8 \times 10^8$                      | $7.2 \times 10^8$                      | \$21.6M                               | \$64.1M                               | \$121.3M                             |
| West Virginia (WV)       | 173.5                             | $6.3 \times 10^8$                      | $2.0 \times 10^9$                      | $3.7 \times 10^9$                      | \$106.6M                              | \$334.2M                              | \$628.0M                             |
| <b>(East)</b>            | <b>2784.7</b>                     | <b><math>1.1 \times 10^{10}</math></b> | <b><math>3.8 \times 10^{10}</math></b> | <b><math>5.9 \times 10^{10}</math></b> | <b>\$1.9B</b>                         | <b>\$6.3B</b>                         | <b>\$10.7B</b>                       |
| Iowa (IA)                | 395.4                             | $3.2 \times 10^9$                      | $7.9 \times 10^9$                      | $1.4 \times 10^{10}$                   | \$539.4M                              | \$1.3B                                | \$2.3B                               |
| Illinois (IL)            | 721.8                             | $6.5 \times 10^9$                      | $1.6 \times 10^{10}$                   | $2.8 \times 10^{10}$                   | \$1.1B                                | \$2.7B                                | \$4.7B                               |
| Indiana (IN)             | 466.6                             | $3.4 \times 10^9$                      | $8.8 \times 10^9$                      | $1.6 \times 10^{10}$                   | \$577.5M                              | \$1.5B                                | \$2.6B                               |
| Michigan (MI)            | 371.6                             | $2.5 \times 10^9$                      | $6.9 \times 10^9$                      | $1.3 \times 10^{10}$                   | \$429.5M                              | \$1.2B                                | \$2.1B                               |
| Minnesota (MN)           | 414.1                             | $4.0 \times 10^9$                      | $9.8 \times 10^9$                      | $1.7 \times 10^{10}$                   | \$679.1M                              | \$1.6B                                | \$2.9B                               |
| Missouri (MO)            | 462.5                             | $2.6 \times 10^9$                      | $7.2 \times 10^9$                      | $1.3 \times 10^{10}$                   | \$442.0M                              | \$1.2B                                | \$2.2B                               |
| Ohio (OH)                | 577.6                             | $3.0 \times 10^9$                      | $8.4 \times 10^9$                      | $1.5 \times 10^{10}$                   | \$498.4M                              | \$1.4B                                | \$2.6B                               |
| Wisconsin (WI)           | 557.3                             | $3.4 \times 10^9$                      | $1.1 \times 10^{10}$                   | $1.9 \times 10^{10}$                   | \$699.8M                              | \$1.8B                                | \$3.3B                               |
| <b>(Midwest)</b>         | <b>3966.9</b>                     | <b><math>2.9 \times 10^{10}</math></b> | <b><math>7.6 \times 10^{10}</math></b> | <b><math>1.3 \times 10^{11}</math></b> | <b>\$5.0B</b>                         | <b>\$12.7B</b>                        | <b>\$22.7B</b>                       |
| Arkansas (AR)            | 363.2                             | $1.0 \times 10^9$                      | $3.4 \times 10^9$                      | $6.4 \times 10^9$                      | \$172.1M                              | \$570.1M                              | \$1.1B                               |
| Louisiana (LA)           | 397.6                             | $2.6 \times 10^9$                      | $7.1 \times 10^9$                      | $1.3 \times 10^{10}$                   | \$440.1M                              | \$1.2B                                | \$2.1B                               |
| Oklahoma (OK)            | 558.5                             | $4.4 \times 10^9$                      | $1.1 \times 10^{10}$                   | $1.9 \times 10^{10}$                   | \$742.6M                              | \$1.9B                                | \$3.2B                               |
| Texas (TX)               | 3888.7                            | $3.4 \times 10^{10}$                   | $8.5 \times 10^{10}$                   | $1.5 \times 10^{11}$                   | \$5.7B                                | \$24.1B                               | \$24.9B                              |
| <b>(South Central)</b>   | <b>5208.0</b>                     | <b><math>4.2 \times 10^{10}</math></b> | <b><math>1.1 \times 10^{11}</math></b> | <b><math>1.9 \times 10^{11}</math></b> | <b>\$7.1B</b>                         | <b>\$27.8B</b>                        | <b>\$31.4B</b>                       |
| Alabama (AL)             | 674.6                             | $2.1 \times 10^9$                      | $6.8 \times 10^9$                      | $1.3 \times 10^{10}$                   | \$355.7M                              | \$1.1B                                | \$2.2B                               |
| Florida (FL)             | 1676.3                            | $8.7 \times 10^9$                      | $2.7 \times 10^{10}$                   | $5.0 \times 10^{10}$                   | \$1.5B                                | \$4.5B                                | \$8.5B                               |
| Georgia (GA)             | 1604.6                            | $3.6 \times 10^9$                      | $1.3 \times 10^{10}$                   | $2.5 \times 10^{10}$                   | \$603.8M                              | \$2.2B                                | \$4.2B                               |
| Kentucky (KY)            | 339.6                             | $1.3 \times 10^9$                      | $4.1 \times 10^9$                      | $7.6 \times 10^9$                      | \$218.8M                              | \$685.1M                              | \$1.3B                               |
| Mississippi (MS)         | 418.9                             | $1.5 \times 10^9$                      | $4.7 \times 10^9$                      | $8.9 \times 10^9$                      | \$251.8M                              | \$801.2M                              | \$1.5B                               |
| North Carolina (NC)      | 1166.7                            | $3.3 \times 10^9$                      | $1.1 \times 10^{10}$                   | $2.1 \times 10^{10}$                   | \$549.7M                              | \$1.8B                                | \$3.5B                               |
| South Carolina (SC)      | 769.1                             | $1.9 \times 10^9$                      | $6.7 \times 10^9$                      | $1.3 \times 10^{10}$                   | \$315.0M                              | \$1.1B                                | \$2.2B                               |
| Tennessee (TN)           | 745.1                             | $2.7 \times 10^9$                      | $8.4 \times 10^9$                      | $1.6 \times 10^{10}$                   | \$454.4M                              | \$1.4B                                | \$2.6B                               |
| Virginia (VA)            | 614.1                             | $1.7 \times 10^9$                      | $5.7 \times 10^9$                      | $1.1 \times 10^{10}$                   | \$283.7M                              | \$962.9M                              | \$1.8B                               |
| <b>(Southeast)</b>       | <b>8009.0</b>                     | <b><math>2.7 \times 10^{10}</math></b> | <b><math>8.7 \times 10^{10}</math></b> | <b><math>1.7 \times 10^{11}</math></b> | <b>\$4.5B</b>                         | <b>\$14.5B</b>                        | <b>\$27.8B</b>                       |
| Colorado (CO)            | 366.0                             | $3.0 \times 10^9$                      | $7.4 \times 10^9$                      | $1.3 \times 10^{10}$                   | \$500.7M                              | \$1.2B                                | \$2.2B                               |
| Kansas (KS)              | 304.0                             | $3.2 \times 10^9$                      | $7.4 \times 10^9$                      | $1.3 \times 10^{10}$                   | \$533.1M                              | \$1.2B                                | \$2.1B                               |
| Montana (MT)             | 219.2                             | $1.9 \times 10^9$                      | $4.7 \times 10^9$                      | $8.1 \times 10^9$                      | \$325.9M                              | \$792.0M                              | \$1.4B                               |
| North Dakota (ND)        | 362.9                             | $3.8 \times 10^9$                      | $9.1 \times 10^9$                      | $1.5 \times 10^{10}$                   | 641.6M                                | \$1.5B                                | \$2.6B                               |
| Nebraska (NE)            | 183.1                             | $1.5 \times 10^9$                      | $3.7 \times 10^9$                      | $6.5 \times 10^9$                      | \$254.2M                              | \$625.8M                              | \$1.1B                               |
| South Dakota (SD)        | 124.8                             | $1.2 \times 10^9$                      | $2.9 \times 10^9$                      | $5.0 \times 10^9$                      | \$208.5M                              | \$494.6M                              | \$848.8M                             |
| Wyoming (WY)             | 87.5                              | $5.6 \times 10^8$                      | $1.5 \times 10^9$                      | $2.7 \times 10^9$                      | \$94.5M                               | \$251.1M                              | \$448.8M                             |
| <b>(Northern Plains)</b> | <b>1647.5</b>                     | <b><math>1.5 \times 10^{10}</math></b> | <b><math>3.7 \times 10^{10}</math></b> | <b><math>6.3 \times 10^{10}</math></b> | <b>\$2.6B</b>                         | <b>\$6.1B</b>                         | <b>\$10.7B</b>                       |
| Arizona (AZ)             | 679.2                             | $4.4 \times 10^9$                      | $1.2 \times 10^{10}$                   | $2.1 \times 10^{10}$                   | \$746.0M                              | \$1.9B                                | \$3.6B                               |
| California (CA)          | 549.0                             | $3.3 \times 10^9$                      | $9.2 \times 10^9$                      | $1.7 \times 10^{10}$                   | \$558.5M                              | \$1.6B                                | \$2.8B                               |
| Idaho (ID)               | 150.3                             | $1.2 \times 10^9$                      | $3.0 \times 10^9$                      | $5.2 \times 10^9$                      | \$206.5M                              | \$505.4M                              | \$884.7M                             |
| New Mexico (NM)          | 337.5                             | $2.4 \times 10^9$                      | $6.2 \times 10^9$                      | $9.7 \times 10^9$                      | \$402.6M                              | \$1.0B                                | \$1.9B                               |
| Nevada (NV)              | 332.1                             | $2.4 \times 10^9$                      | $6.1 \times 10^9$                      | $1.1 \times 10^{10}$                   | \$402.8M                              | \$1.0B                                | \$1.8B                               |
| Oregon (OR)              | 136.2                             | $1.1 \times 10^9$                      | $2.7 \times 10^9$                      | $4.8 \times 10^9$                      | \$187.5M                              | \$462.2M                              | \$806.6M                             |
| Utah (UT)                | 242.1                             | $2.2 \times 10^9$                      | $5.2 \times 10^9$                      | $9.0 \times 10^9$                      | \$364.7M                              | \$881.7M                              | \$1.5B                               |
| Washington (WA)          | 249.7                             | $3.1 \times 10^9$                      | $7.4 \times 10^9$                      | $1.3 \times 10^{10}$                   | \$526.6M                              | \$1.3B                                | \$2.2B                               |
| <b>(West)</b>            | <b>2676.1</b>                     | <b><math>2.0 \times 10^{10}</math></b> | <b><math>5.2 \times 10^{10}</math></b> | <b><math>9.0 \times 10^{10}</math></b> | <b>\$3.4B</b>                         | <b>\$8.6B</b>                         | <b>\$15.4B</b>                       |
| <b>Total</b>             | <b>24,292.2</b>                   | <b><math>1.4 \times 10^{11}</math></b> | <b><math>4.0 \times 10^{11}</math></b> | <b><math>7.0 \times 10^{11}</math></b> | <b>\$24.4B</b>                        | <b>\$76.1B</b>                        | <b>\$118.7B</b>                      |

Note: M = million =  $10^6$ , B = billion =  $10^9$ .
